# Supplementary material for: CA9, CYFIP2 and LGALS3BP—A Novel Biomarker Panel to Aid Prognostication in Glioma
Source: MDPI journal article supplement (doi:10.3390/cancers16051069), 2024-03-06
Supplement: s1 [file s1]

## SUPPLEMENTARY MATERIAL

Title: *CA9, CYFIP2 and LGALS3BP - a novel biomarker panel to aid prognostication in glioma*

Authors: Amanda L. Hudson <sup>1,2,3\*</sup>, Angela Cho <sup>1,2,3†</sup>, Emily K. Colvin <sup>1,2</sup>, Sarah A. Hayes <sup>1,2</sup>, Helen R. Wheeler <sup>3,4</sup> and Viive M. Howell <sup>1,2</sup>.

<sup>1</sup>Bill Walsh Translational Cancer Research Laboratory, Kolling Institute, Royal North Shore Hospital, Northern Sydney Local Health District, St. Leonards, 2065, Australia

<sup>2</sup>School of Medical Sciences, Faculty of Medicine and Health, University of Sydney, Sydney, NSW, 2006, Australia

<sup>3</sup>The Brain Cancer Group, North Shore Private Hospital, St. Leonards, NSW, 2065, Australia

<sup>4</sup>Department of Medical Oncology, Royal North Shore Hospital, Northern Sydney Local Health District, St. Leonards, NSW 2065, Australia

### Supplementary Figures and Table list

Figure S1: Representative images of the 6 candidate biomarkers in glioma tissue sections and their different scoring results.

Figure S2: Interaction schematic of the CA9, CYFIP2 and LGALS3BP using STRING.

Table S1: Clinical characteristics of discovery cohort.

Table S2: Immunohistochemistry antibodies.

Table S3: Cut off points for defining low and high protein expression by IHC.

Table S4: Differentially expressed proteins identified in discovery cohort.

Table S5: Cancer related functions and association with prognosis of candidate biomarkers.

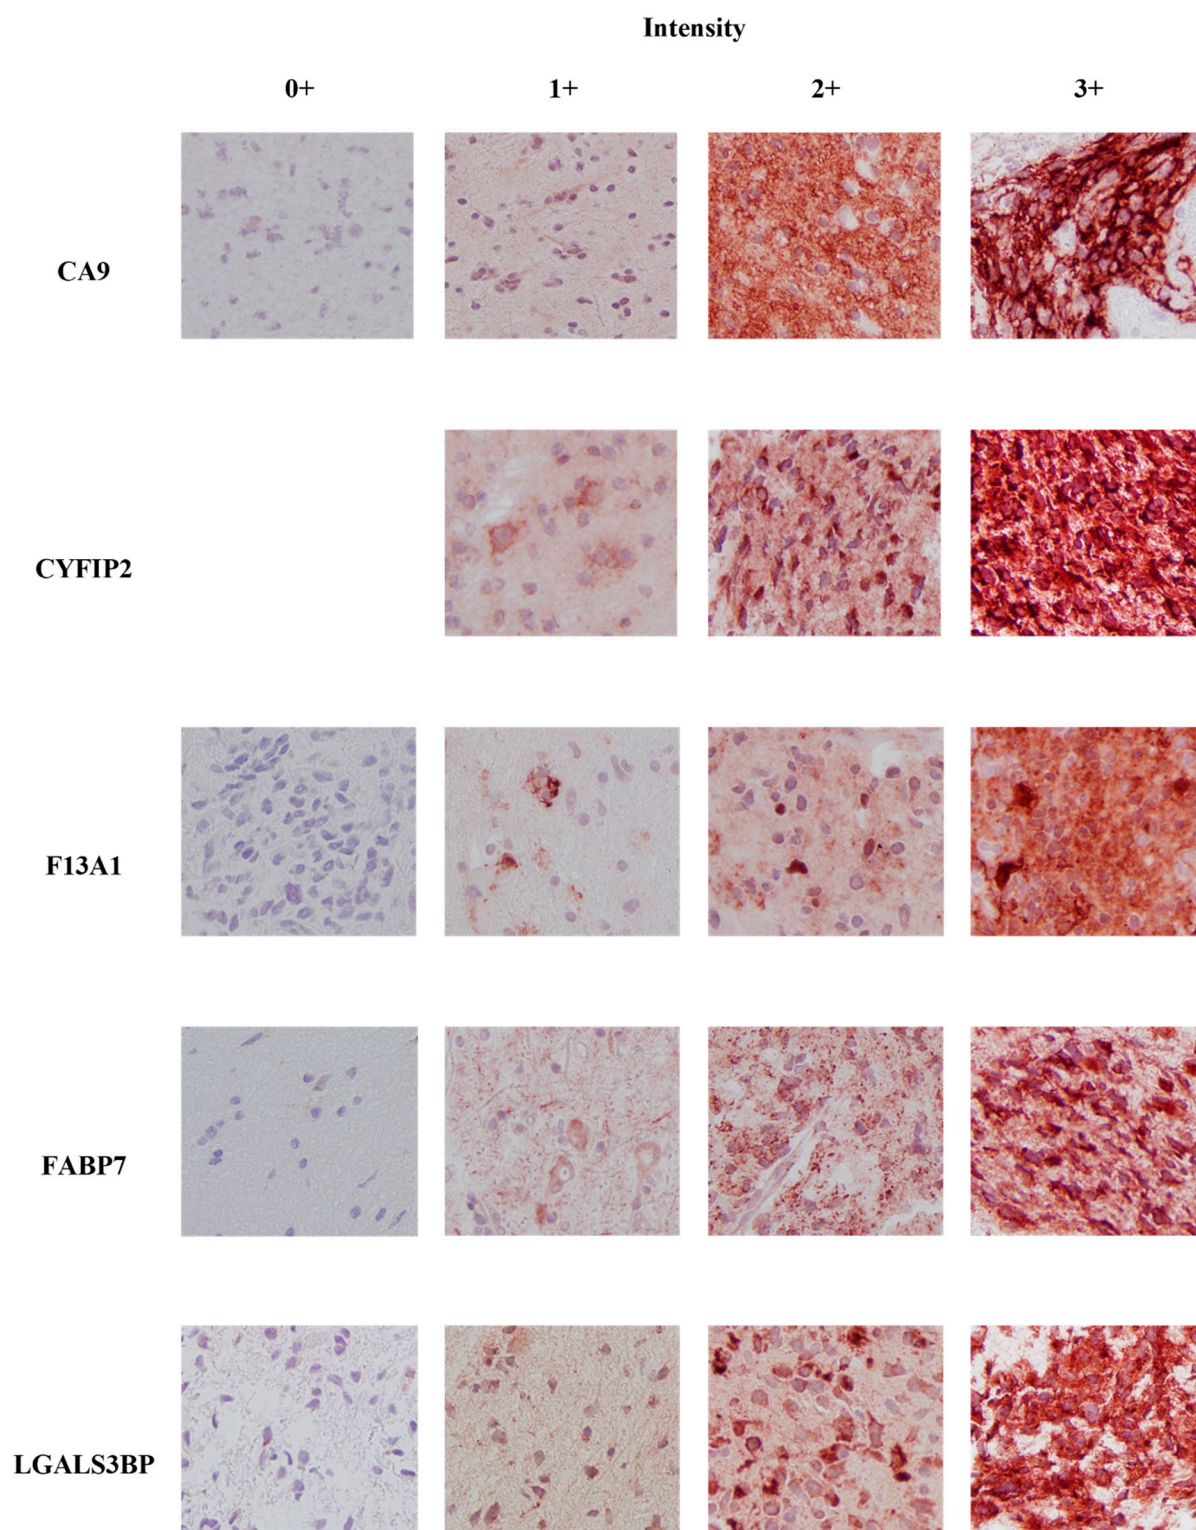

**Figure S1: Representative images of the 6 candidate biomarkers in glioma tissue sections and their different scoring results. 20 × magnification.**

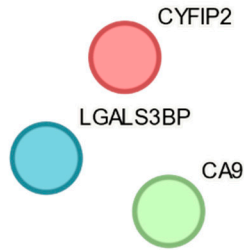

#### Nodes:

##### Network nodes represent proteins

*splice isoforms or post-translational modifications are collapsed, i.e. each node represents all the proteins produced by a single, protein-coding gene locus.*

##### Node Color

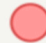

*colored nodes:  
query proteins and first shell of interactors*

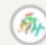

*white nodes:  
second shell of interactors*

##### Node Content

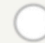

*empty nodes:  
proteins of unknown 3D structure*

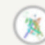

*filled nodes:  
a 3D structure is known or predicted*

#### Edges:

##### Edges represent protein-protein associations

*associations are meant to be specific and meaningful, i.e. proteins jointly contribute to a shared function; this does not necessarily mean they are physically binding to each other.*

##### Known Interactions

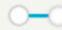

*from curated databases*

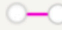

*experimentally determined*

##### Predicted Interactions

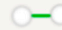

*gene neighborhood*

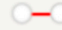

*gene fusions*

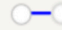

*gene co-occurrence*

##### Others

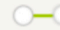

*textmining*

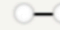

*co-expression*

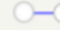

*protein homology*

#### Your Input:

● CYFIP2

*Cytoplasmic FMR1-interacting protein 2; Involved in T-cell adhesion and p53/TP53-dependent induction of apoptosis. Does not bind RNA. As component of the WAVE1 complex, required for BDNF-NTRK2 endocytic trafficking and signaling from early endosomes (By similarity). (1278 aa)*

● CA9

*Carbonic anhydrase 9; Reversible hydration of carbon dioxide. Participates in pH regulation. May be involved in the control of cell proliferation and transformation. Appears to be a novel specific biomarker for a cervical neoplasia. (459 aa)*

● LGALS3BP

*Galectin-3-binding protein; Promotes integrin-mediated cell adhesion. May stimulate host defense against viruses and tumor cells. (585 aa)*

#### Your Current Organism:

Homo sapiens

*NCBI taxonomy Id: [9606](#)*

*Other names: H. sapiens, human, man*

**SI Figure 2: Interaction schematic of the CA9, CYFIP2 and LGALS3BP using STRING** (accessed 5<sup>th</sup> December 2023) confirming no published interaction have been identified [1].

**Table S1:** Clinical characteristics of discovery cohort.

|                                         | Number of patients (%) |
|-----------------------------------------|------------------------|
| <b>Gender</b>                           |                        |
| Female                                  | 4 (66.7)               |
| Male                                    | 2 (33.3)               |
| <b>Age at diagnosis (years)</b>         |                        |
| Median                                  | 38                     |
| Range                                   | 30-46                  |
| <b>IDH</b>                              |                        |
| <i>IDH1 R132H</i>                       | 5 (83.3)               |
| <i>IDH1 R132G</i>                       | 1 (16.7)               |
| <b>Primary tumour grade</b>             |                        |
| II                                      | 4 (66.6)               |
| III                                     | 2 (33.3)               |
| <b>Recurrent tumour grade</b>           |                        |
| III                                     | 1 (16.6)               |
| IV                                      | 5 (83.3)               |
| <b>Treatment (in between specimens)</b> |                        |
| Radiotherapy                            | 3 (50)                 |
| None                                    | 3 (50)                 |
| <b>Time to recurrence (Months)*</b>     |                        |
| Median                                  | 46                     |
| Range                                   | 14-99                  |
| <b>Outcome#</b>                         |                        |
| Alive                                   | 4 (66.7)               |
| Dead                                    | 2 (33.3)               |

\*calculated as the months between the primary and recurrent surgery; #censor date, 29<sup>th</sup> Feb 2020.

**Table S2:** Immunohistochemistry antibodies.

| <b>Specificity</b>                                                             | <b>Host species/Isotype</b> | <b>Concentration (µg/ml)</b> | <b>Company</b>    | <b>Catalogue number</b> |
|--------------------------------------------------------------------------------|-----------------------------|------------------------------|-------------------|-------------------------|
| <b>CA9 (carbonic anhydrase 9)</b>                                              | Rabbit IgG                  | 0.5                          | Abcam             | Ab15086                 |
| <b>CYFIP2 (cytoplasmic FMR1-interacting protein 2)</b>                         | Rabbit IgG                  | 2.5                          | Life Technologies | PA568449                |
| <b>F13A1 (Coagulation factor XIII A chain)</b>                                 | Rabbit IgG                  | 0.25                         | Sigma-Aldrich     | HPA001804               |
| <b>FABP7 (Fatty acid-binding protein, brain)</b>                               | Rabbit IgG                  | 0.25                         | Sigma-Aldrich     | HPA028825               |
| <b>LGALS3BP (galectin-3-binding Protein)</b>                                   | Rabbit IgG                  | 0.25                         | Sigma-Aldrich     | HPA000554               |
| <b>PRKAR1A (cAMP-dependent protein kinase type I-alpha regulatory subunit)</b> | Rabbit IgG                  | 1                            | Sigma-Aldrich     | HPA049979               |

**Table S3:** Cut off points for defining low and high protein expression by IHC.

| <b>Protein (Cellular localisation)</b>   | <b>Expression level</b> | <b>Concordance score (Tumour cells staining (%) × intensity)</b> |
|------------------------------------------|-------------------------|------------------------------------------------------------------|
| <b>CA9 (membranous/<br/>cytoplasmic)</b> | None                    | 0                                                                |
|                                          | Any (Low- high)         | > 0                                                              |
| <b>F13A1 (cytoplasmic)</b>               |                         |                                                                  |
| <b>CYFIP2 (cytoplasmic)</b>              | Low                     | ≤ 200                                                            |
| <b>FABP7 (cytoplasmic)</b>               | High                    | >200                                                             |
| <b>LGALS3BP (cytoplasmic)</b>            | Low                     | ≤ 95                                                             |
|                                          | High                    | >95                                                              |
| <b>PRKAR1A (cytoplasmic)</b>             | Low                     | ≤ 40                                                             |
|                                          | High                    | > 40                                                             |

**Table S4:** Differentially expressed proteins identified in discovery cohort. *Samples were further stratified into patients that received no treatment (A) and those that received radiotherapy (B) in between their surgeries. P-value <0.05 indicates significant results.*

| Direction of change* | Comparison | Uniprot ID | Protein Name                                        | Protein abbreviation | Log 2 FC | P - value |
|----------------------|------------|------------|-----------------------------------------------------|----------------------|----------|-----------|
| UP                   | A          | Q16527     | Cysteine and glycine-rich protein 2                 | CSRP2                | 2.09     | 0.027     |
|                      | A          | Q08380     | Galectin-3-binding protein                          | LGALS3BP             | 1.52     | 0.024     |
|                      | A          | P04004     | Vitronectin                                         | VTN                  | 1.43     | 0.034     |
|                      | A          | Q6IAA8     | Ragulator complex protein                           | LAMTOR1              | 1.10     | 0.035     |
|                      | A          | P01042     | Kininogen-1                                         | KNG1                 | 1.02     | 0.016     |
|                      | B          | P00488     | Coagulation factor XIII A chain                     | F13A1                | 1.39     | 0.044     |
| DOWN                 | A          | Q9NZJ7     | Mitochondrial carrier homolog 1                     | MTCH1                | - 1.07   | 0.013     |
|                      | A          | O00429     | Dynamin-1-like protein                              | DNM1L                | - 1.08   | 0.032     |
|                      | A          | P31946     | 14-3-3 protein beta/alpha                           | YWHAB                | - 1.15   | 0.012     |
|                      | A          | P08195     | 4F2 cell-surface antigen heavy chain                | SLC3A2               | - 1.19   | 0.013     |
|                      | A          | P07954     | Fumarate hydratase                                  | FH                   | 1.21     | 0.014     |
|                      | A          | P21796     | Voltage-dependent anion-selective channel protein 1 | VDAC1                | - 1.23   | 0.007     |
|                      | A          | Q9P2R7     | Succinate-CoA ligase                                | SUCLA2               | - 1.24   | 0.015     |
|                      | A          | Q9H936     | Mitochondrial glutamate carrier 1                   | SLC25A22             | - 1.28   | 0.040     |
|                      | A          | O43301     | Heat shock 70 kDa protein 12A                       | HSPA12A              | - 1.31   | 0.045     |
|                      | A          | Q99798     | Aconitate hydratase                                 | ACO2                 | - 1.31   | 0.033     |
|                      | A          | O75306     | NADH dehydrogenase                                  | NDUFS2               | - 1.36   | 0.005     |
|                      | A          | O15540     | Fatty acid-binding protein                          | FABP7                | - 1.38   | 0.008     |

|  |   |        |                                                               |         |           |       |
|--|---|--------|---------------------------------------------------------------|---------|-----------|-------|
|  | A | Q96F07 | Cytoplasmic FMR1-interacting protein 2                        | CYFIP2  | -<br>1.43 | 0.024 |
|  | A | P46459 | Vesicle-fusing ATPase                                         | NSF     | -<br>1.65 | 0.045 |
|  | A | P68366 | Tubulin alpha-4A chain                                        | TUBA4A  | -<br>1.69 | 0.046 |
|  | A | Q9BRX8 | Redox-regulatory protein FAM213A                              | PRXL2A  | -<br>1.81 | 0.018 |
|  | A | Q99719 | Septin-5                                                      | SEPTIN5 | -<br>1.85 | 0.034 |
|  | A | P80723 | Brain acid soluble protein 1                                  | BASP1   | -<br>1.87 | 0.048 |
|  | B | P13637 | Sodium/potassium-transporting ATPase subunit alpha-3          | ATP1A3  | -<br>1.02 | 0.004 |
|  | B | P62873 | Guanine nucleotide-binding protein                            | GNB1    | -<br>1.06 | 0.044 |
|  | B | P37840 | Alpha-synuclein                                               | SNCA    | -<br>1.07 | 0.006 |
|  | B | P10644 | cAMP-dependent protein kinase type I-alpha regulatory subunit | PRKAR1A | -<br>1.09 | 0.013 |
|  | B | P60880 | Synaptosomal-associated protein 25                            | SNAP25  | -<br>1.13 | 0.011 |
|  | B | P08247 | Synaptophysin                                                 | SYP     | -<br>1.14 | 0.007 |
|  | B | P17600 | Synapsin-1                                                    | SYN1    | -<br>1.41 | 0.002 |
|  | B | P63027 | Vesicle-associated membrane protein 2                         | VAMP2   | -<br>1.50 | 0.006 |

*\*in recurrent samples.*



**Table S5:** Cancer related functions and association with prognosis of candidate biomarkers.

| Protein name (Symbol, Uniprot ID)                              | Function                                                                                                                                     | Associations with cancer                                                                                                                                                                                                                                                                                                                                                                                  | References       |
|----------------------------------------------------------------|----------------------------------------------------------------------------------------------------------------------------------------------|-----------------------------------------------------------------------------------------------------------------------------------------------------------------------------------------------------------------------------------------------------------------------------------------------------------------------------------------------------------------------------------------------------------|------------------|
| <b>Carbonic anhydrase 9 (CA9, Q16790)</b>                      | pH regulation; hypoxia inducible                                                                                                             | Glioma - silencing of CA9 reduced invasion, enhanced susceptibility to temozolomide (TMZ) and radiotherapy <i>in vitro</i> ; inhibition of CA9 enhances pro-apoptotic effects of TMZ; overexpression is associated with poorer overall survival.                                                                                                                                                          | [12, 13, 28, 43] |
| <b>Cytoplasmic FMR1-interacting protein 2 (CYFIP2, Q96F07)</b> | Pro-apoptotic protein and a direct target of TP53. Involved in T-cell adhesion.                                                              | Repression of CYFIP2 promoted colon cancer cell proliferation, growth and survival. Knockdown promoted proliferation, chemoresistance and inhibited apoptosis in gastric cancer cells.                                                                                                                                                                                                                    | [34, 44]         |
| <b>Coagulation factor XIII A chain (F13A1, P00488)</b>         | Key component in the coagulation cascade. F13A1 cross-links fibrin chains and protects them from fibrinolysis to strengthen the fibrin clot. | High expression associated with progression in lung squamous carcinomas. Downregulated in tumour-educated platelets in non-small cell lung cancer. Plasma levels in ovarian cancer patients were significantly higher compared to controls. Serum levels of the activation peptide of F13A1 were significantly reduced in colorectal patients.                                                            | [45-49]          |
| <b>Fatty acid-binding protein, brain (FABP7, O15540)</b>       | Important in the formation of the radial glial fibre in the developing brain.                                                                | Glioma - highly expressed in grade IV gliomasU251 glioma cells<br>Overexpression or knockdown in glioma cell line U251 promoted or reduced proliferation, respectively. In glioma neurospheres, expression increased after radiation and resulted in enhanced migration and proliferation.<br><br>Melanoma, breast cancer, renal cell carcinoma - overexpressed and associated with proliferation, higher | [50-57]          |

|                                                                                        |                                                                                                                                 |                                                                                                                                                                                                                                                                        |         |
|----------------------------------------------------------------------------------------|---------------------------------------------------------------------------------------------------------------------------------|------------------------------------------------------------------------------------------------------------------------------------------------------------------------------------------------------------------------------------------------------------------------|---------|
|                                                                                        |                                                                                                                                 | grade of malignancy and shorter overall survival.                                                                                                                                                                                                                      |         |
| <b>Galectin-3-binding protein (LGALS3BP, Q08380)</b>                                   | Essential role in centrosome structure and function; modulates cell-cell and cell-matrix interactions.                          | Overexpressed in prostate, colorectal and epithelial ovarian cancers. Overexpression inhibits neutrophil-mediated tumour cell killing in colorectal cells.<br><br>Breast cancer – over expression promotes angiogenesis and metastasis; associated with poor survival. | [58-62] |
| <b>cAMP-dependent protein kinase type I-alpha regulatory subunit (PRKAR1A, P10644)</b> | Regulatory subunit of the cyclic adenosine monophosphate (cAMP)- dependent protein kinases involved in cAMP signaling in cells. | Potential tumour suppressor.<br><br>Lung adenocarcinoma - low expression correlated with poor overall survival.<br><br>Inactivating mutations causes Carney Complex (patients develop multiple benign tumours).                                                        | [63-67] |
